# Supplementary material for: Cholera forecast for Dhaka, Bangladesh, with the 2015-2016 El Niño: Lessons learned
Source: PubMed Central journal article supplement (PMC5333828; doi:10.1371/journal.pone.0172355), 2017-03-02

# Mechanistic temporal model: Core and Periphery

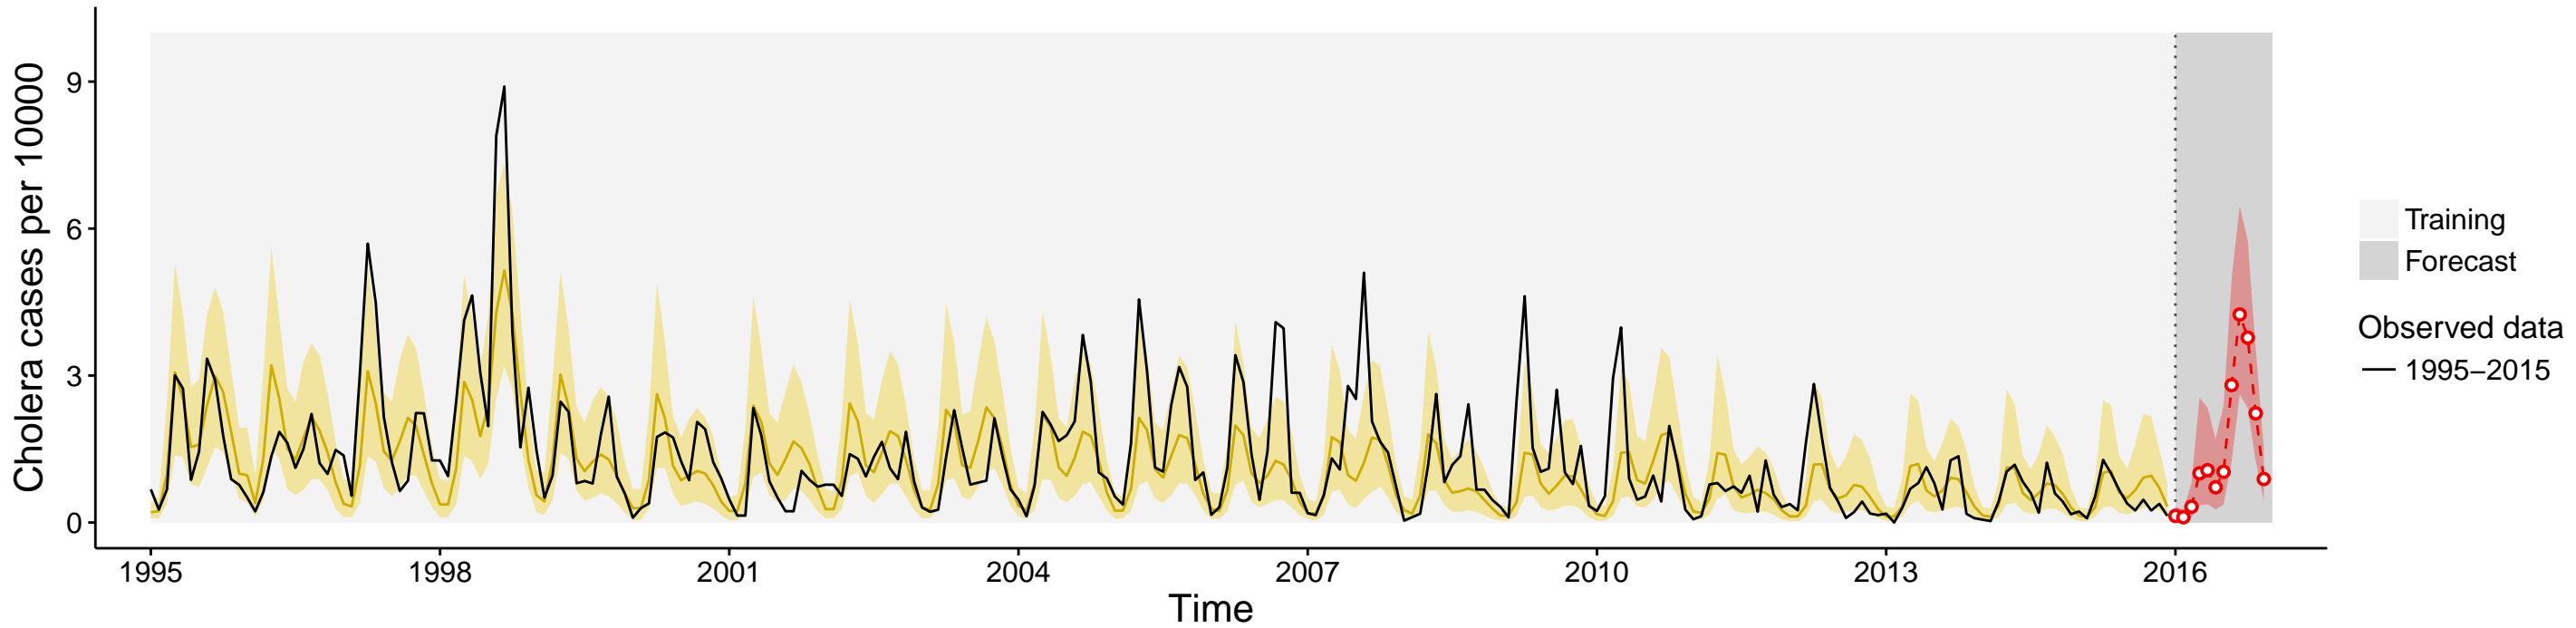

Supplement: pone.0172355.s001.pdf [file pone.0172355.s001.pdf]
